# Supplementary material for: Respiratory mechanics of eleven avian species resident at high and low altitude
Source: Oxford University Press journal article supplement (doi:10.1242/jeb.151191), 2017-03-15
Supplement: jeb151191supp.pdf [file jeb151191supp.pdf]

## Supplementary data 1

**Table S1: Equations for frequency isopleths used to generate mechanics data.**  
Note that elastic work is expressed as  $\log_{10}(\text{elastic work})$ .

| Species                  | Freq | Compliance<br><i>mL cm H<sub>2</sub>O<sup>-1</sup></i> |           | Tau<br><i>seconds</i> |           | Log (Elastic work)<br><i>Joules</i> |           | Resistive work<br><i>Joules</i> |           |
|--------------------------|------|--------------------------------------------------------|-----------|-----------------------|-----------|-------------------------------------|-----------|---------------------------------|-----------|
|                          |      | Slope                                                  | Intercept | Slope                 | Intercept | Slope                               | Intercept | Slope                           | Intercept |
| Puna teal                | 20   | -0.14088                                               | 5.4186    | -0.0132               | 1.24145   | 0.08567                             | -3.30864  | 0.000422                        | -0.00241  |
|                          | 30   | -0.22314                                               | 5.25868   | -0.0431               | 1.3483    | 0.11532                             | -3.57393  | 0.000671                        | -0.00372  |
|                          | 40   | -0.21137                                               | 4.46678   | -0.0413               | 1.19125   | 0.12534                             | -3.5419   | 0.000974                        | -0.00516  |
|                          | 50   | -0.16059                                               | 3.34279   | -0.0516               | 1.21639   | 0.12716                             | -3.39819  | 0.0011                          | -0.00435  |
| Speckled teal            | 20   | -0.15882                                               | 2.89905   | -0.0487               | 1.03967   | 0.14594                             | -3.48033  | 0.0012                          | -0.00374  |
|                          | 30   | -0.25558                                               | 7.02079   | -0.0962               | 2.69017   | 0.09567                             | -3.62765  | 0.000392                        | -0.00219  |
|                          | 40   | -0.18189                                               | 4.70644   | -0.0488               | 1.47918   | 0.10301                             | -3.54716  | 0.000372                        | -0.00074  |
|                          | 50   | -0.13748                                               | 3.61482   | -0.046                | 1.3011    | 0.09528                             | -3.34426  | 0.000301                        | 0.0013    |
| Ruddy duck (highland)    | 20   | -0.09241                                               | 2.67448   | -0.0398               | 1.13024   | 0.0991                              | -3.30296  | 0.000516                        | 0.000563  |
|                          | 30   | -0.08918                                               | 2.29918   | -0.0427               | 1.04757   | 0.10001                             | -3.18192  | 0.000519                        | 0.00182   |
|                          | 40   | -0.03659                                               | 3.17204   | -0.0449               | 1.8595    | 0.1205                              | -3.37661  | 0.000911                        | -0.0033   |
|                          | 50   | -0.10101                                               | 3.74843   | -0.0354               | 1.39383   | 0.12516                             | -3.37969  | 0.00142                         | -0.00604  |
| Yellow-billed pintail    | 20   | -0.06624                                               | 2.78955   | -0.0359               | 1.27898   | 0.1227                              | -3.2485   | 0.0019                          | -0.00751  |
|                          | 30   | -0.08222                                               | 2.62436   | -0.0323               | 1.09125   | 0.10994                             | -3.07804  | 0.0017                          | -0.0047   |
|                          | 40   | -0.09479                                               | 2.56817   | -0.0264               | 0.9179    | 0.12659                             | -3.22544  | 0.0015                          | -0.00361  |
|                          | 50   | -0.19367                                               | 7.34621   | -0.0134               | 1.38518   | 0.1269                              | -3.55208  | 0.000379                        | -0.00115  |
| Cinnamon teal (highland) | 20   | -0.19391                                               | 5.41647   | -0.0008               | 0.869     | 0.13943                             | -3.4998   | 0.000961                        | -0.00386  |
|                          | 30   | -0.25811                                               | 5.17671   | 0.00322               | 0.68819   | 0.15206                             | -3.48219  | 0.00125                         | -0.0046   |
|                          | 40   | -0.28031                                               | 4.813     | -0.037                | 1.03048   | 0.16519                             | -3.48311  | 0.0017                          | -0.00598  |
|                          | 50   | -0.27066                                               | 4.06368   | -0.0298               | 0.85126   | 0.18746                             | -3.53038  | 0.00204                         | -0.00673  |
| Green-winged teal        | 20   | -0.176                                                 | 6.07228   | -0.0483               | 1.9004    | 0.11891                             | -4.193    | 0.000217                        | 0.000564  |
|                          | 30   | -0.09335                                               | 3.85885   | -0.0328               | 1.3173    | 0.10282                             | -3.42399  | 0.00064                         | -0.00358  |
|                          | 40   | -0.13518                                               | 3.78623   | -0.0359               | 1.20556   | 0.11261                             | -3.44285  | 0.000978                        | -0.00563  |
|                          | 50   | -0.1561                                                | 3.55338   | -0.0406               | 1.18712   | 0.12806                             | -3.50829  | 0.000764                        | -0.00264  |
| Lowland ruddy duck       | 20   | -0.1614                                                | 3.20883   | -0.0323               | 0.99597   | 0.13215                             | -3.4319   | 0.00104                         | -0.00387  |
|                          | 30   | -0.08636                                               | 3.66463   | -0.0046               | 1.57524   | 0.05718                             | -3.19342  | 0.000116                        | 0.000315  |
|                          | 40   | -0.08618                                               | 3.15194   | -0.0493               | 1.596     | 0.07419                             | -3.40704  | 0.000257                        | -0.00076  |
|                          | 50   | -0.10426                                               | 3.07119   | -0.0278               | 1.18682   | 0.0925                              | -3.56108  | 0.000578                        | -0.00372  |
| Northern pintail         | 20   | -0.05999                                               | 2.02437   | -0.0505               | 1.26139   | 0.07917                             | -3.21392  | 0.000417                        | 0.000142  |
|                          | 30   | -0.03155                                               | 1.45774   | -0.0484               | 1.11779   | 0.06701                             | -2.98753  |                                 |           |
|                          | 40   | -0.13407                                               | 4.54491   | -0.0356               | 1.69509   | 0.09015                             | -3.32055  | 0.000775                        | -0.00525  |
|                          | 50   | -0.10823                                               | 3.30096   | -0.0402               | 1.48895   | 0.10544                             | -3.35968  | 0.00128                         | -0.00707  |
| Lowland cinnamon teal    | 20   | -0.13934                                               | 3.24693   | -0.0594               | 1.57322   | 0.12127                             | -3.41213  | 0.00167                         | -0.00863  |
|                          | 30   | -0.10842                                               | 2.55283   | -0.0493               | 1.31386   | 0.11656                             | -3.28398  | 0.00249                         | -0.01345  |
|                          | 40   | -0.14215                                               | 2.54226   | -0.0735               | 1.42141   | 0.13594                             | -3.32945  | 0.00241                         | -0.01052  |
|                          | 50   | 0.02813                                                | 4.19927   | -0.0227               | 1.41165   | 0.09708                             | -3.13595  | 0.000699                        | -0.00298  |
| Mallard                  | 20   | -0.10759                                               | 4.88717   | -0.0123               | 1.02636   | 0.14131                             | -3.42291  | 0.000989                        | -0.00352  |
|                          | 30   | -0.2347                                                | 4.91717   | -0.0284               | 1.01913   | 0.15354                             | -3.43217  | 0.00153                         | -0.00558  |
|                          | 40   | -0.29027                                               | 4.66899   | -0.0464               | 1.09919   | 0.18765                             | -3.58578  | 0.00191                         | -0.00653  |
|                          | 50   | -0.34139                                               | 4.68514   | -0.0448               | 0.97013   | 0.19389                             | -3.52639  | 0.00257                         | -0.00889  |
| Gadwall                  | 20   | -0.12245                                               | 4.40648   | -0.0153               | 1.25255   | 0.06029                             | -3.19468  | 0.000195                        | -0.00111  |
|                          | 30   | -0.10462                                               | 3.43797   | -0.0043               | 1.02203   | 0.08116                             | -3.45881  | 0.000272                        | -0.00083  |
|                          | 40   | -0.09118                                               | 2.73044   | -0.0165               | 0.95115   | 0.09384                             | -3.48706  | 0.000483                        | -0.00248  |
|                          | 50   | -0.09029                                               | 2.4177    | -0.029                | 0.95148   | 0.09736                             | -3.41752  | 0.000549                        | -0.00162  |
| Gadwall                  | 20   | -0.04088                                               | 1.58265   | -0.0565               | 1.08345   | 0.08798                             | -3.21149  | 0.000879                        | -0.00406  |
|                          | 30   | 0.15811                                                | 4.23218   | 0.00471               | 1.02858   | 0.11795                             | -3.16781  | 0.000791                        | -0.00296  |
|                          | 40   | -0.04533                                               | 4.72927   | -0.0089               | 0.87202   | 0.13158                             | -3.18147  | 0.00157                         | -0.00672  |
|                          | 50   | -0.32329                                               | 6.0298    | -0.0457               | 1.06034   | 0.17792                             | -3.40605  | 0.00229                         | -0.0096   |
| Gadwall                  | 20   | -0.2822                                                | 4.92293   | -0.0631               | 1.12095   | 0.18339                             | -3.34631  | 0.00289                         | -0.01129  |
|                          | 30   | -0.27826                                               | 4.41005   | -0.0637               | 1.01917   | 0.18465                             | -3.28613  | 0.00319                         | -0.0115   |
|                          | 40   | 0.02246                                                | 5.38243   | 0.00682               | 1.09305   | 0.12766                             | -3.33979  | 0.000719                        | -0.00304  |
|                          | 50   | -0.12242                                               | 5.3849    | 0.00684               | 0.82912   | 0.15209                             | -3.46048  | 0.00109                         | -0.00383  |
| Gadwall                  | 20   | -0.28042                                               | 5.55778   | 0.0016                | 0.77051   | 0.17757                             | -3.53474  | 0.00192                         | -0.00738  |
|                          | 30   | -0.42774                                               | 6.064     | -0.0468               | 1.03025   |                                     | -3.5783   | 0.00221                         | -0.00765  |
|                          | 40   | -0.41336                                               | 5.27063   | -0.0546               | 0.99916   | 0.22288                             | -3.63347  |                                 |           |
|                          | 50   |                                                        |           |                       |           |                                     |           |                                 |           |
